# Supplementary material for: Haptoglobin-Conjugated Gold Nanoclusters as a Nanoantibiotic to Combat Bacteremia
Source: MDPI journal article supplement (doi:10.3390/nano12203596), 2022-10-13
Supplement: s1 [file s1]

## Supplementary Materials

# Haptoglobin-Conjugated Gold Nanoclusters as a Nanoantibiotic to Combat Bacteremia

Hsiu-Yi Chu <sup>1,2,†</sup>, Lung-Ching Chen <sup>3,†</sup>, Tsung-Rong Kuo <sup>4,5,†</sup>, Chun-Che Shih <sup>6,7,8,9</sup>, Sibidou Yougbaré <sup>10</sup>, Yu-Han Chen <sup>1</sup> and Tsai-Mu Cheng <sup>1,6,\*</sup>

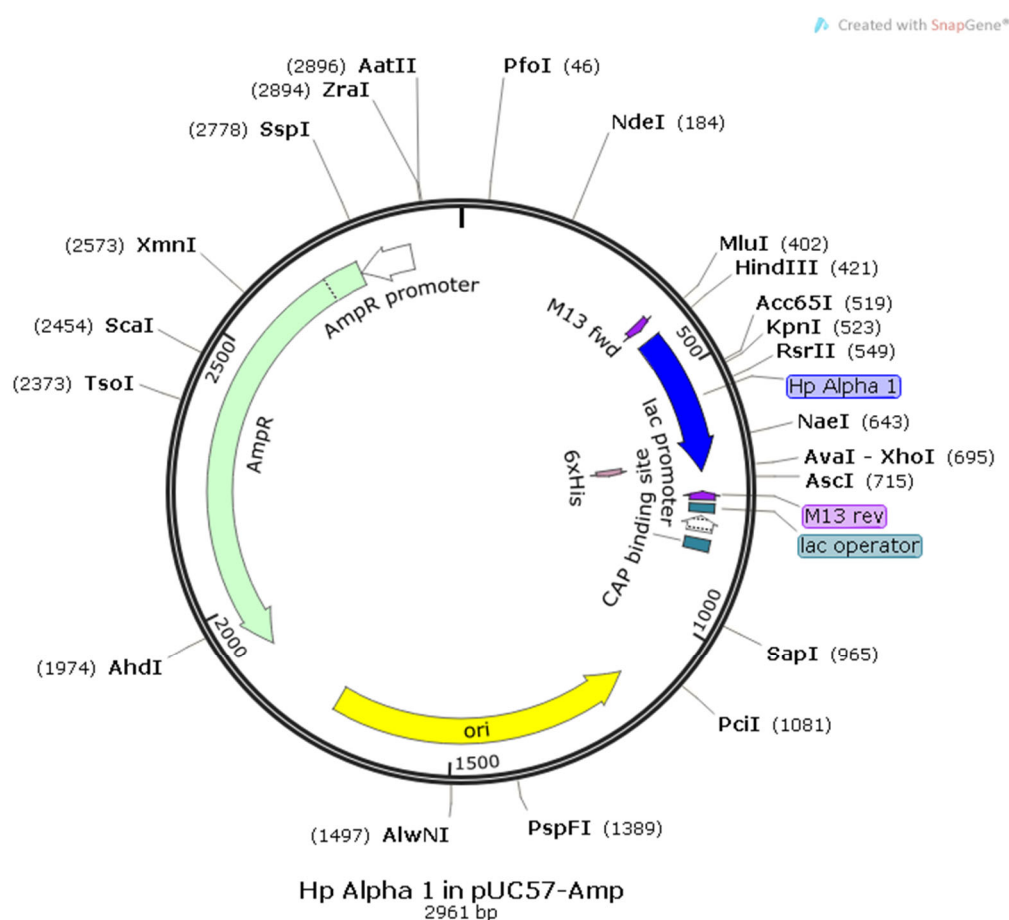

**Figure S1.** The plasmid map of pUC57-Amp vector.

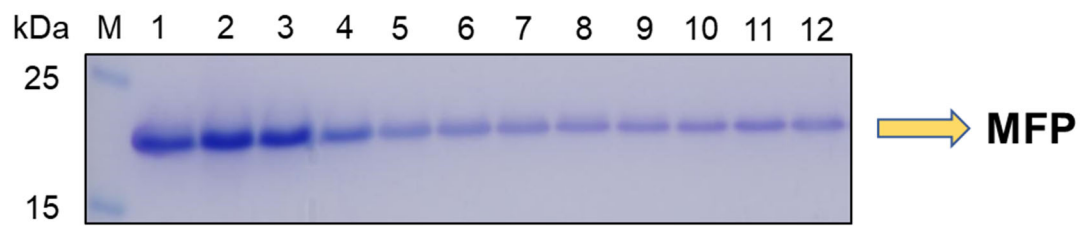

**Figure S2.** The SDS-PAGE showed the fraction of purified MFP. MFP expressed in *E. coli* was purified by His-tag affinity column. The fractions of eluent were applied to run SDS-PAGE as visualized by Coomassie R-250 staining. The purity >95% eluted fractions were pulled and further concentrated in PBS (pH 8.0) for experiments. M: MW marker, 1-12: Elution fraction, MFP: multiple functional peptide.

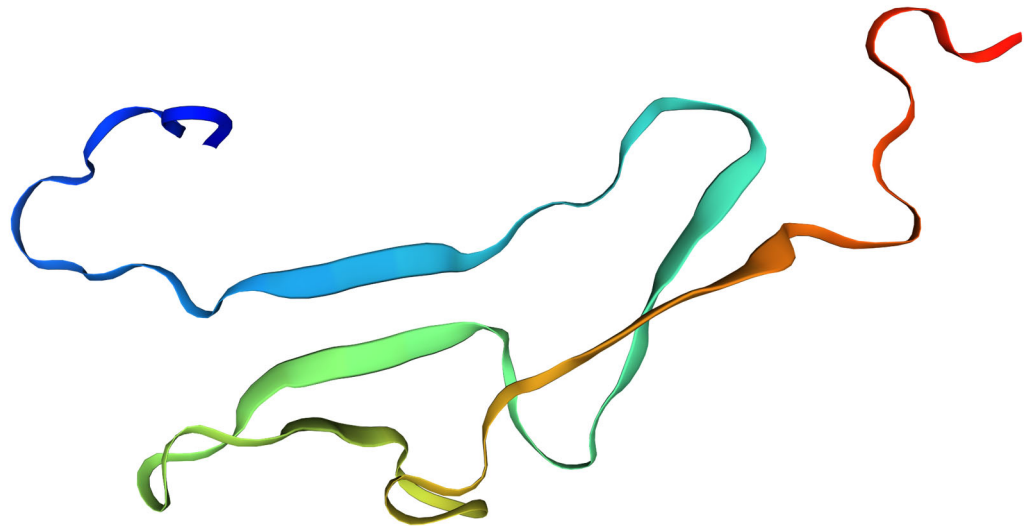

**Figure S3.** The 3D structure of the derived Hp peptide.
